# Supplementary material
Source: PubMed Central journal article supplement (PMC2878028)
Supplement: supp_M110.108365_jbc.M110.108365-1.pdf [file supp_M110.108365_jbc.M110.108365-1.pdf]

**Supplementary materials for**

**A COMMON SUBSTRATE RECOGNITION MODE CONSERVED BETWEEN KATANIN P60 AND VPS4 GOVERNS MICROTUBULE SEVERING AND MEMBRANE SKELETON REORGANIZATION \***

**Naoko Iwaya<sup>1,2,3</sup>, Yohta Kuwahara<sup>2,3,4</sup>, Yoshie Fujiwara<sup>2,5</sup>, Natsuko Goda<sup>2,4</sup>, Takeshi Tenno<sup>2,4</sup>, Kohei Akiyama<sup>3</sup>, Shogo Mase<sup>2,4</sup>, Hidehito Tochio<sup>1</sup>, Takahisa Ikegami<sup>6</sup>, Masahiro Shirakawa<sup>1</sup>, Hidekazu Hiroaki<sup>2,3,4,5</sup>**

<sup>1</sup>Department of Molecular Engineering, Graduate School of Engineering, Kyoto University

<sup>2</sup>Division of Structural Biology, Graduate School of Medicine, Kobe University, 7-5-1 Kusunokicho, Chuo, Kobe, Hyogo 650-0017, Japan

<sup>3</sup>Field of Supramolecular Biology, International Graduate School of Arts and Sciences, Yokohama City University

<sup>4</sup>Institute for Bioinformatics Research and Development (BIRD), Japan Science and Technology Corporation (JST)

<sup>5</sup>Global-COE (Center of Excellence) Program for Integrative Membrane Biology, Kobe University

<sup>6</sup>Institute of Protein Research, Osaka University

Running title: Structure of the N-terminal domain of katanin p60

Address correspondence to : Hidekazu Hiroaki, PhD., e-mail: [hiroakih@med.kobe-u.ac.jp](mailto:hiroakih@med.kobe-u.ac.jp), Phone: +81 78 382 5813 / Fax: +81 78 382 5816

## SUPPLEMENTARY EXPERIMENTAL PROCEDURES

*Production of Full-length kp60* - Expression vector for the recombinant GST-tagged full-length kp60 of mouse was constructed by standard protocol using PCR, and ligated into *Bam*HI-*Sall* sites of pGEX-6P3 (GE Healthcare Bioscience). Ala-substituted mutants were engineered with QuikChange site-directed mutagenesis kit (Stratagene). The fusion proteins were produced in *E. coli* JM109. Expression was induced with 0.1 mM IPTG, and LB cultures were grown overnight at 20 °C. For pull-down assays, GST-tagged proteins were bound to glutathione-Sepharose 4B (GE Healthcare Bioscience) and washed with the storage buffer (20 mM Tris-HCl, pH 7.5, 150 mM NaCl, 1 mM MgCl<sub>2</sub>, and 0.1 mM ATP) supplemented with EDTA-free protease inhibitor cocktail (Nacal tesque Inc, Kyoto, Japan) on column. GST-kp60s bound to glutathione-Sepharose were eluted with the elution buffer (50 mM Tris-HCl, 100 mM NaCl, 40 mM reduced glutathione, pH 8.0, and 5% glycerol). The eluents were further used for ATPase assays.

*ATPase assays* - ATPase activity was measured using an ATP regenerating system (1). The reaction mixture containing 50 mM Tris-HCl, pH 7.5, 50 mM KCl, 2 mM MgCl<sub>2</sub>, 2 mM phosphoenolpyruvate, 1 mM ATP, 50 µg/ml pyruvate kinase, 50 µg/ml lactate dehydrogenase, and 0.2 mM NADH was used. The reactions were initiated by the addition of GST-kp60s (0.5 µM), and the activities were measured by monitoring the decrease of NADH absorption at 340 nm at room temperature using UV-Vis spectrophotometer, UV mini-1240 (Shimadzu, Tokyo, Japan). The data were normalized for further analysis.

*Tubulin Binding Assays* - 5 µg of GST-proteins bound to glutathione-Sepharose 4B (20 µl) were incubated with 10 µg of tubulin in the binding buffer (80 mM PIPES, pH 7.0, 1 mM MgCl<sub>2</sub> and 1 mM EGTA) for 30 min at 4°C. The beads were washed four times in the wash buffer (4.3 mM Na<sub>2</sub>HPO<sub>4</sub>, 1.47 mM KH<sub>2</sub>PO<sub>4</sub>, 137 mM NaCl, 2.7 mM KCl, pH 7.3, and 5% glycerol). The associated proteins were eluted in the elution buffer (50 mM Tris-HCl, 100 mM NaCl, 50 mM reduced glutathione, pH 8.0, and 5% glycerol). The eluted proteins were analyzed by SDS-PAGE and Western blotting.

*Western Blotting* - Proteins were resolved in SDS-PAGE and blotted onto a PVDF membrane. We detected tubulin using 1/2000 diluted anti- $\alpha$ -tubulin antibody (Sigma-Aldrich) followed by HRP-conjugated anti-mouse IgG secondary antibody (Promega). The proteins were visualized using an ECL-Plus kit (GE Healthcare Bioscience) and detected using LAS-1000 detector (Fuji Film, Tokyo, Japan).

*Model building* - A molecular model of the complex of kp60-NTD with a tubulin tetramer was constructed based on the complex between spastin-MIT and CHMP1b (PDB: 3eab). The kp60-NTD structure and the tubulin tetramer (3du7) were superimposed onto the corresponding position of spastin-MIT and the C-terminal helix of CHMP1b (174-193), respectively. The best model fully overridden on helices with binding sites was selected considering steric clash and complementary charge interactions between structures. A hexameric ring model of AAA ATPase domains of kp60 was generated by superimposing the C $\alpha$  atoms of kp60 onto those of the hexameric ring structure of p97 D1 (PDB: 1s3s) using MODELLER (version 9v6) (<http://salilab.org/modeller/>). Finally, the complex model structure of hexameric full-length kp60 with tubulin oligomer was constructed using MOLMOL (2) by joining the components manually.

## SUPPLEMENTARY FIGURE LEGENDS

### Supplementary Fig. 1.

Phylogenetic tree of the AAA protein superfamily. Red circle, kp60 subfamily; Blue circle, Vps4 subfamily. The tree data were calculated by ClustalX (3) and the tree was drawn with TreeView (<http://taxonomy.zoology.gla.ac.uk/rod/treeview.html>).

### Supplementary Fig. 2.

Ramachandran plot for the phi-psi values of the final 20 structures of kp60-NTD. This figure was produced using PROCHECK-NMR (4).

### Supplementary Fig. 3.

Interactions between kp60-NTD and MTs/tubulin dimer. *A*, schematic diagram of pull-down assay using Microtubule binding protein spin down assay kit, BK029 (Cytoskeleton) to assess interactions between GST-tagged kp60-NTD and MTs/tubulin *in vitro*. GST-tagged kp60-NTD was mixed with a reaction solution after (upper left) and before (upper right) tubulin polymerization reaction, then ultracentrifuged. Tubulin was separated by molecular weight; polymerized MTs were sedimented at the bottom of tubes, non-polymerized tubulin migrated to the top of the solution (lower panel). Reaction solutions were divided into four fractions (from top to bottom) and each fraction was analyzed by SDS-PAGE. GST-tagged kp60-NTD co-sedimented with non-polymerized tubulin. *B*, the reaction solution after polymerization of only tubulin was ultracentrifuged and analyzed as a control. Lanes 1–4 correspond to fractions from top to bottom, indicated in the lower panels of *A*. *C*, pull-down assay for kp60-NTD mixed after tubulin polymerization reaction. kp60-NTD may possibly bind with a tubulin dimer rather than MTs. *D*, pull-down assays of the GST-tagged kp60-NTD mixed before tubulin polymerization reaction. SDS-PAGES are Coomassie-stained.

### Supplementary Fig. 4.

ATPase activity of full-length kp60 and interactions of kp60 with tubulin. *A*, ATPase activities of kp60s (0.5  $\mu$ M) at 340 nm. Filled diamond (continuous line): wild type, filled box (dotted line): R49A, filled triangle (broken line): K67A. *B*, pull-down assays of tubulin with wild type (WT) of GST-kp60 and Ala mutants *in vitro*. Molecular size is shown in the left. Tubulin was used as the input. Only the buffer and the GST-tag mixed with tubulin as negative controls are shown in lanes 2 and 3. Recombinant proteins used for pull-down are indicated at the top of the gel. Filled and open arrowheads show tubulin and full-length kp60s, respectively. SDS-PAGE was Coomassie-stained (upper panel). Western blotting analysis of tubulin bound to full-length kp60s was visualized by ECL (lower panel).

### Supplementary Fig. 5.

Comparison of structures and tubulin binding interfaces with other tubulin binding domains. Tubulin binding interfaces are indicated by black and arrows. *A*, stathmin-like domain bound to the tubulin (white) (PDB: 1sa1); *B*, EB1 CH domain (2qjz); *C*, Msps TOG2 domain (2qk2); *D*, CAP-Gly domain bound to the tubulin peptide (white) (2e4h), and *E*, tubulin-specific chaperone cofactor A (1h7c).

### Supplementary Fig. 6.

Model for  $\alpha$ -tubulin helix 12 binding with kp60-NTD. An electrostatic surface potential diagram (top), a ribbon diagram (middle), and a sequence conservation diagram (bottom) for kp60-NTD were shown.  $\alpha$ -Tubulin helix 12 is shown as a transparent cylinder (yellow).

### Supplementary Fig. 7.

Comparison between model for tubulin binding interfaces of kp60-NTD. *A*, model of kp60-NTD bound to  $\alpha$ -tubulin at the helix 1/3 interface (see text). Ribbon diagram of the model complex between kp60-NTD and a tubulin tetramer (grey) was constructed based on the complex between spastin-MIT and CHMP1b (PDB: 3eab).  $\alpha$ -tubulin helix 12, a putative interface to kp60-NTD, is colored yellow. *B* and *C*, side (top) and top (bottom) views of the ribbon diagram of the complex between kp60-NTD and  $\alpha$ -tubulin using the helix 1/3 and helix 2/3 interfaces, respectively. Side chains of key residues for binding tubulin are shown (red). *D*, top view of the ribbon diagram of the complex between spastin-MIT and CHMP1b (yellow) (3eab). Side chains of the residues interacting between spastin and CHMP1b are indicated.

**Supplementary Fig. 8.**

Proposed model for tubulin binding with full-length kp60. Model complex between tubulin oligomer (grey) and hexameric full-length kp60, composed of kp60-NTD and AAA ATPase domain (violet) is shown. AAA ATPase domains form hexameric ring. Five of the six kp60-NTDs on the hexameric AAA ATPase domains were not drawn for clarity. One of the tubulin C-terminal tail is shown in yellow. The tail on the surface of MT may bind to the pore of the hexameric AAA ATPase domain of kp60.



### Supplementary Table 1.

#### Oligonucleotides used as primers for Ala substitution.

| Primer | Sequence                                                           |
|--------|--------------------------------------------------------------------|
| Q35A_F | CAGGGAGTTCTTGAC <b>GCC</b> ATGAACAAGTACCTGTACTCAGTC                |
| Q35A_R | GACTGAGTACAGGTA <b>CTT</b> GTTCAT <b>GGCG</b> TCAAGAACTCCCTG       |
| N37A_F | CAGGGAGTTCTTGACCAAA <b>TGGCC</b> AAGTACCTGTACTCAGTC                |
| N37A_R | GACTGAGTACAGGTA <b>CTTGGCC</b> ATTTGGTCAAGAACTCCCTG                |
| D45A_F | CTGTA <b>CTCAGTCAAAGCC</b> ACACACCTCCGTCAGAAATGG                   |
| D45A_R | CCATTTCTGACGGAGGTGTGT <b>GGC</b> TTTGACTGAGTACAG                   |
| R49A_F | GTCAAAGATACACAC <b>CTCGCC</b> CAGAAATGGCAACAG                      |
| R49A_R | CTGTTGCCATTTCT <b>GGCG</b> GAGGTGTGTATCTTTGAC                      |
| Q53A_F | CTCCGTCAGAAATGG <b>GCCC</b> CAGGTTTGGCAGGAAATAAATGTG               |
| Q53A_R | CACATTTATTT <b>CCTGCCAA</b> ACCT <b>GGGCC</b> ATTTCTGACGGAG        |
| V55A_F | CTCCGTCAGAAATGGCAACAG <b>GCC</b> TGGCAGGAAATAAATGTG                |
| V55A_R | CACATTTATTT <b>CCTGCCAGGC</b> CTGTTGCCATTTCTGACGGAG                |
| E58A_F | CAGAAATGGCAACAGTTTGGCAG <b>GCC</b> ATAAATGTGGAAGCTAAG              |
| E58A_R | CTTAGCTTCCACATTTAT <b>GGC</b> CTGCCAAACCTGTTGCCATTTCTG             |
| K64A_F | GTTTGGCAGGAAATAAATGTGGAAGCT <b>GCC</b> CAAGTTAAGGATATCATG          |
| K64A_R | CATGATATCCTTAACTT <b>GGC</b> CAGCTTCCACATTTATTT <b>CCTGCCAA</b> AC |
| K67A_F | GTGGAAGCTAAGCAAGTT <b>GCC</b> GATATCATGAAAACATAATAGAGC             |
| K67A_R | GCTCTATTATGTTTT <b>CATGATATCGGC</b> AACTTGCTTAGCTTCCAC             |
| D68A_F | GTGGAAGCTAAGCAAGTTAAG <b>GCC</b> ATCATGAAAACATAATAGAGC             |
| D68A_R | GCTCTATTATGTTTT <b>CATGATGGC</b> CTTAACTTGCTTAGCTTCCAC             |

## SUPPLEMENTARY REFERENCES

1. Hackney, D. D., and Jiang, W. (2001) *Methods Mol Biol* **164**, 65-71
2. Koradi, R., Billeter, M., and Wuthrich, K. (1996) *J Mol Graph* **14**, 29-32
3. Thompson, J. D., Gibson, T. J., Plewniak, F., Jeanmougin, F., and Higgins, D. G. (1997) *Nucleic Acids Res* **25**, 4876-4882
4. Laskowski, R. A., Rullmann, J. A., MacArthur, M. W., Kaptein, R., and Thornton, J. M. (1996) *J Biomol NMR* **8**, 477-486

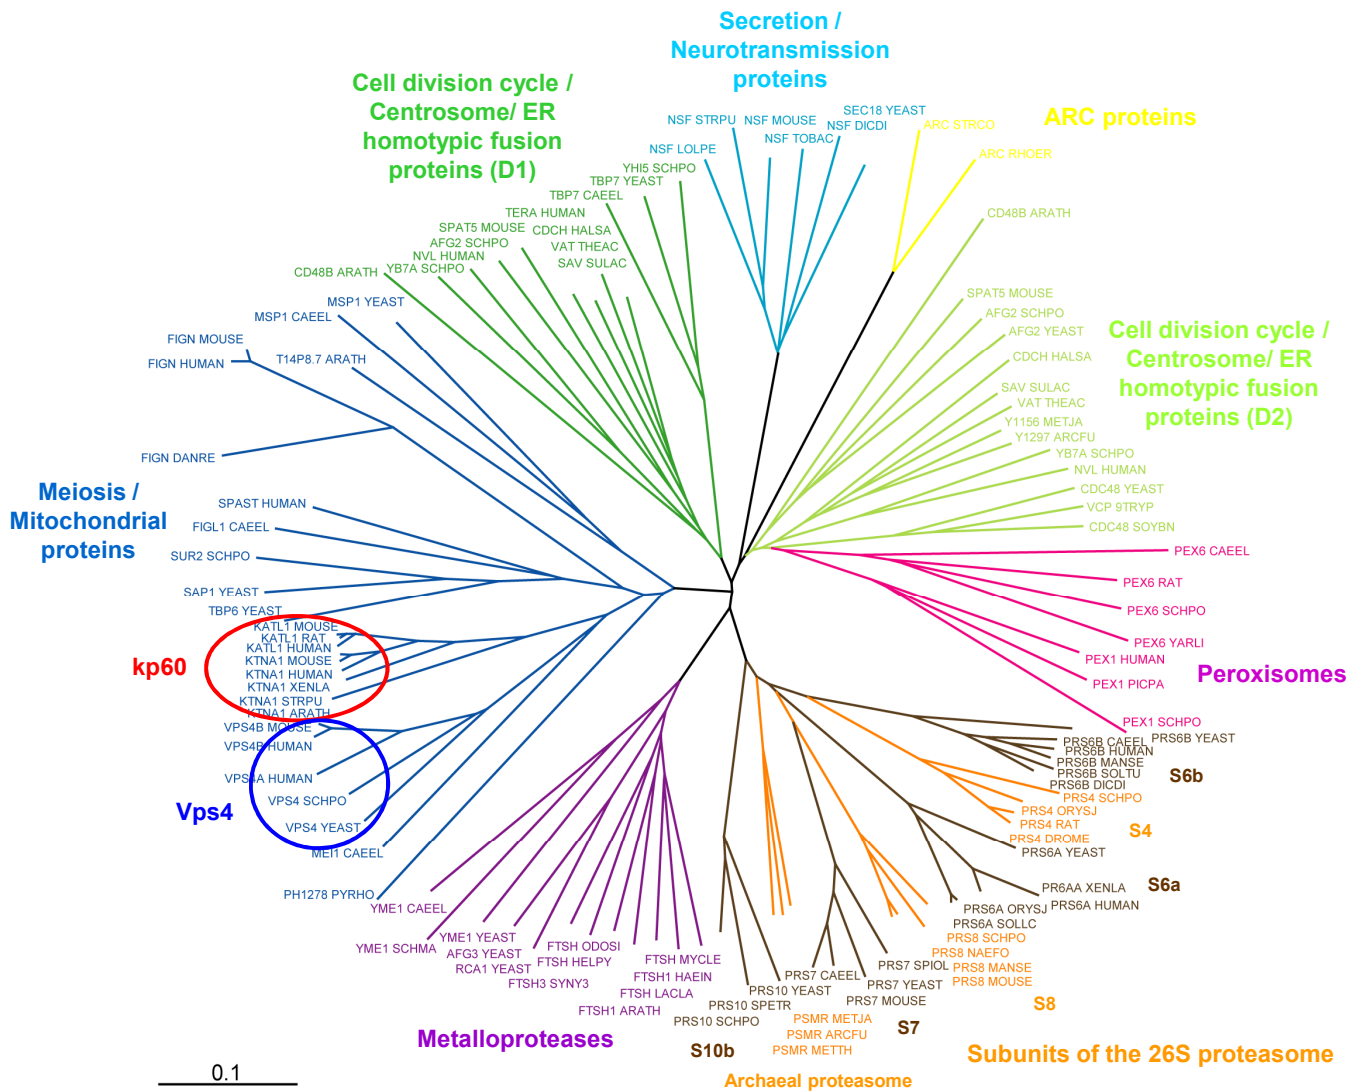

Supplementary Figure 1

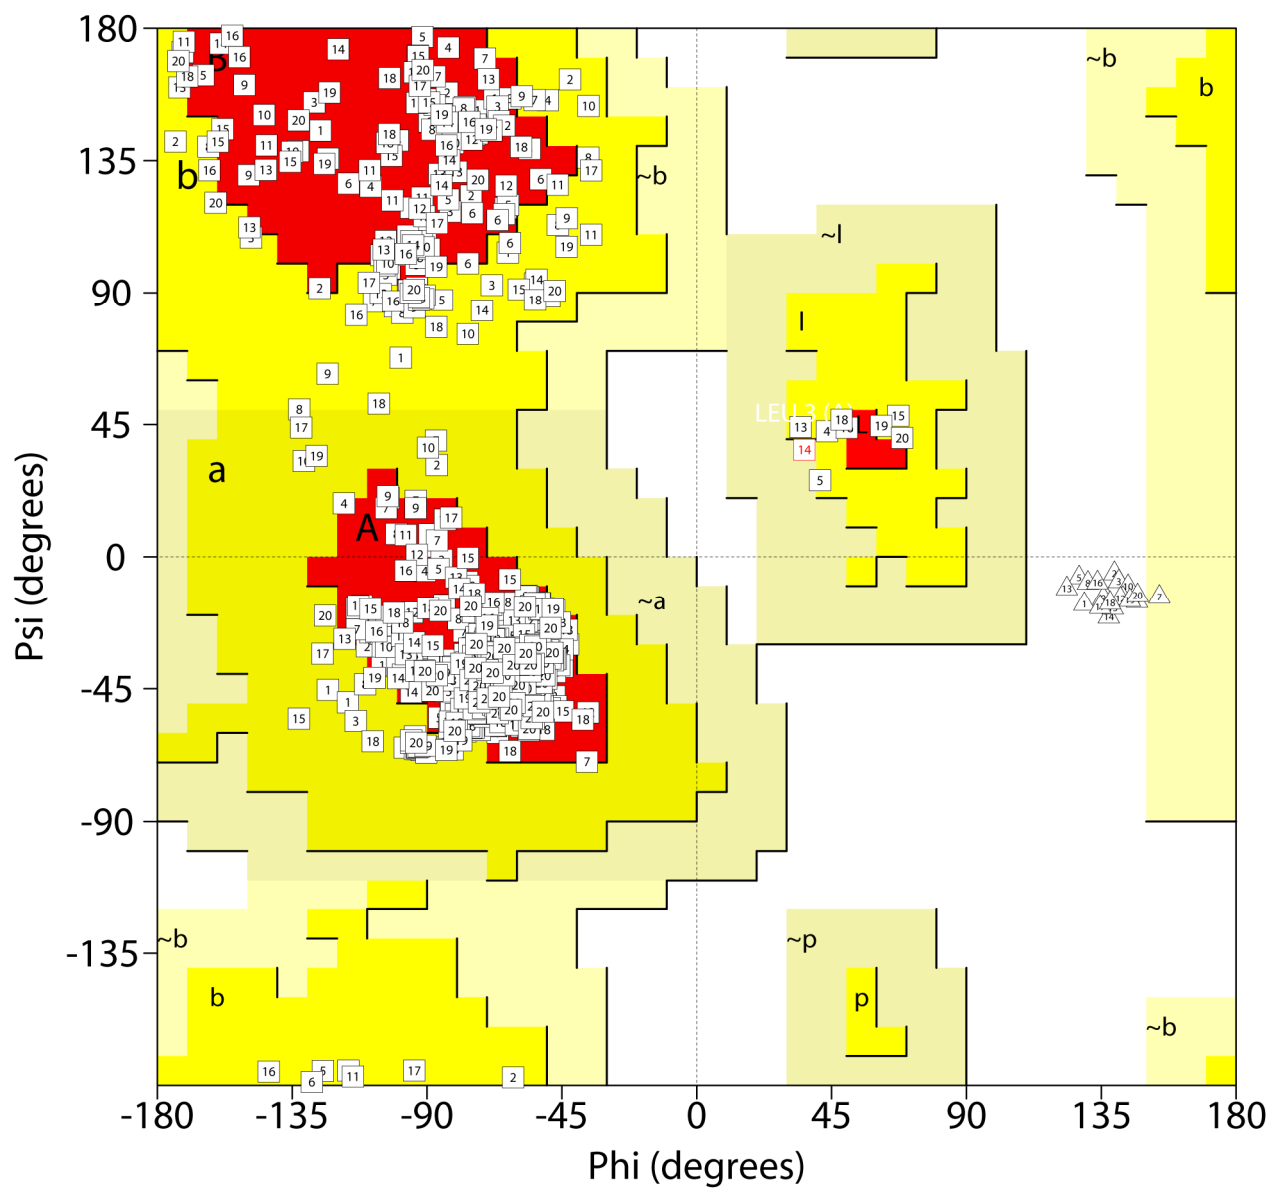

Supplementary Figure 2

**A**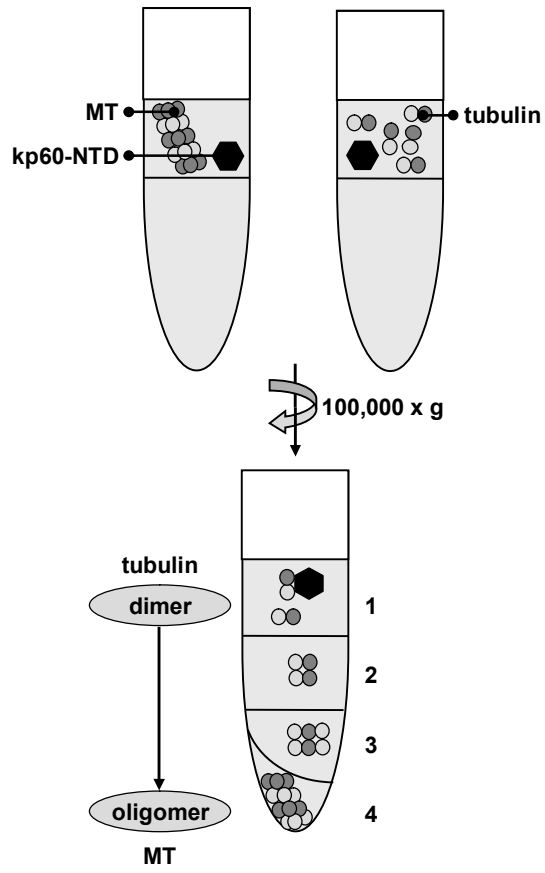**B**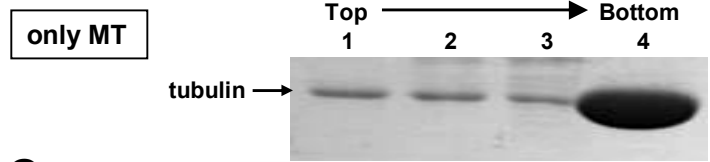**C**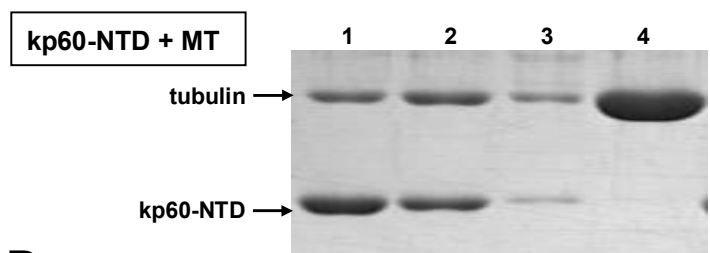**D**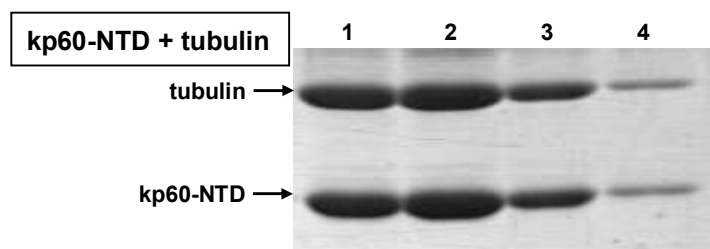

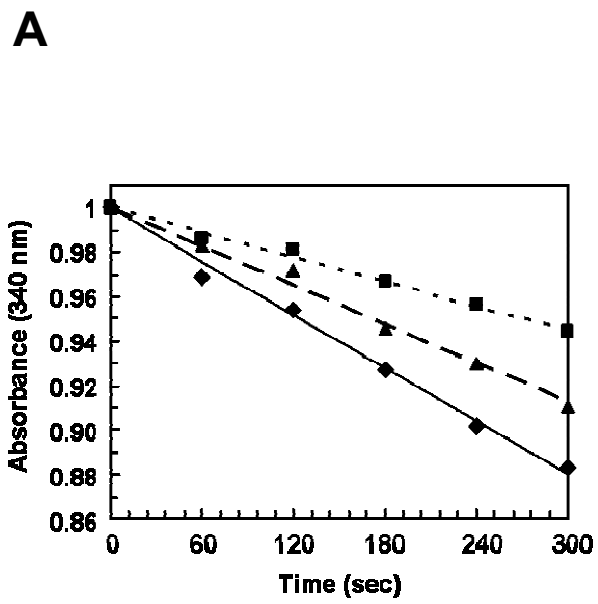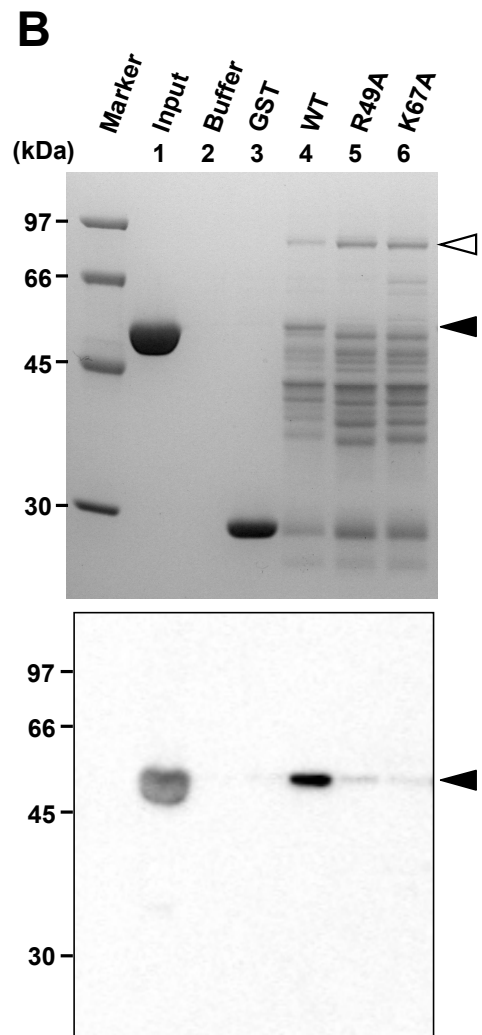

Supplementary Figure 4

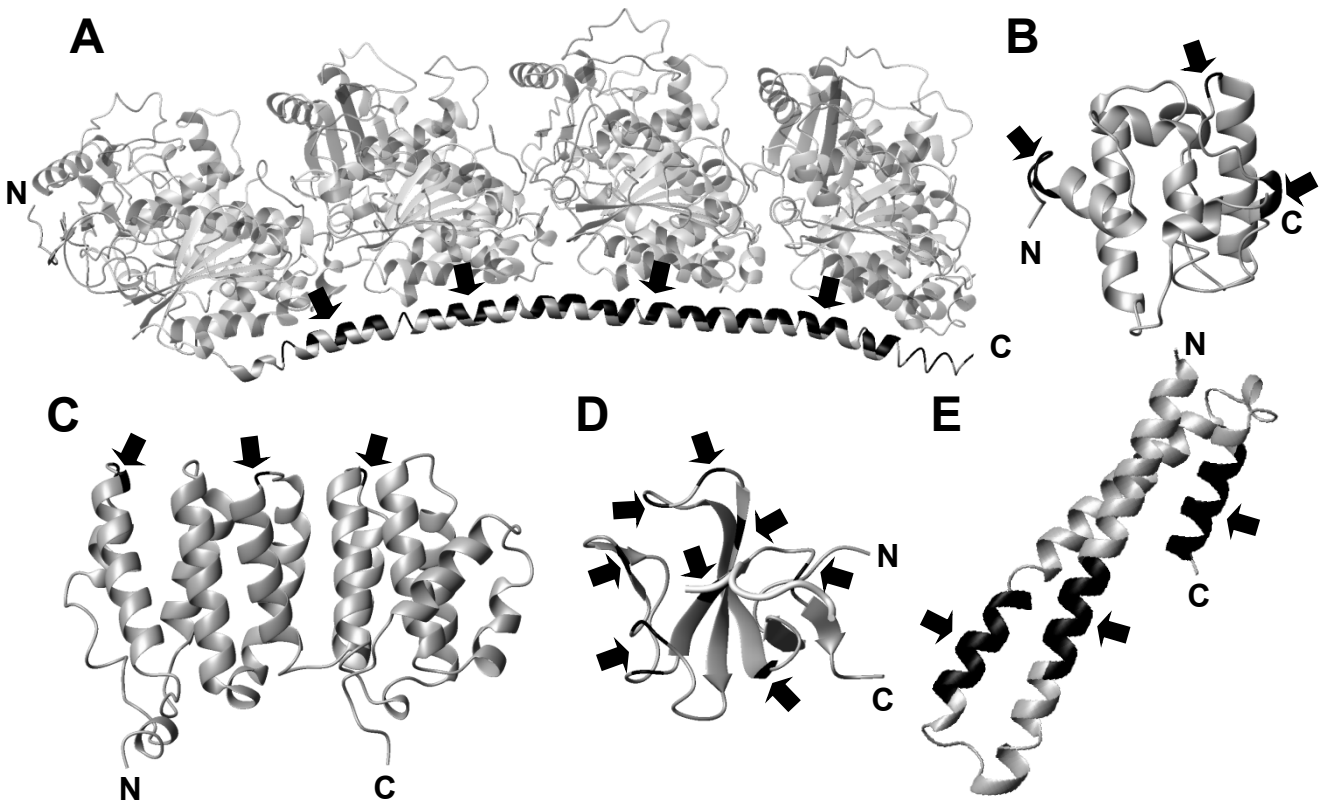

Supplementary Figure 5

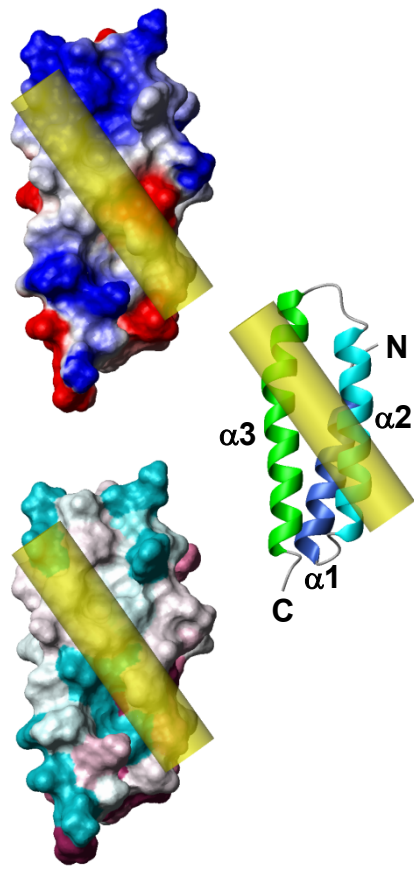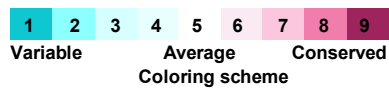

Supplementary Figure 6



**A**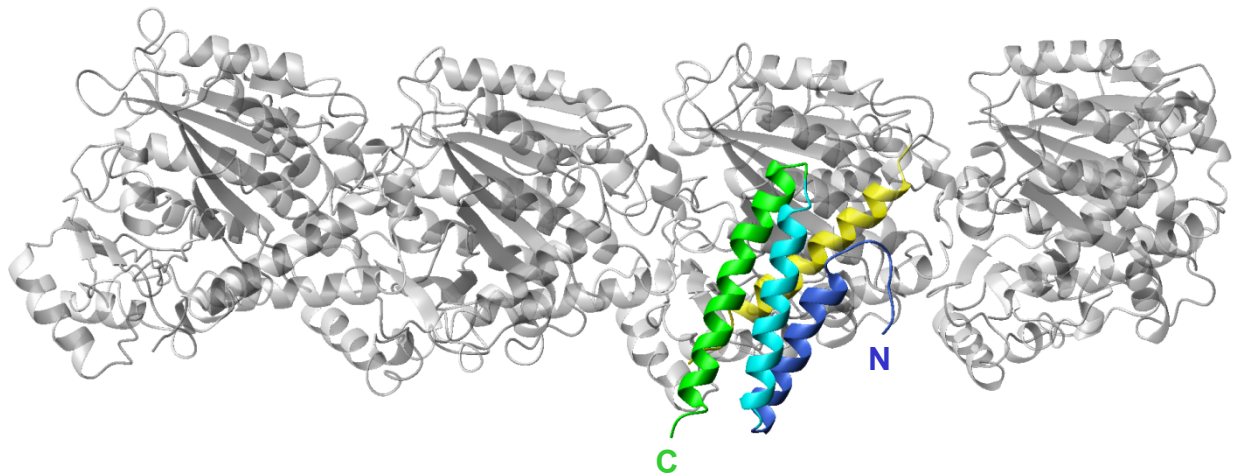**B**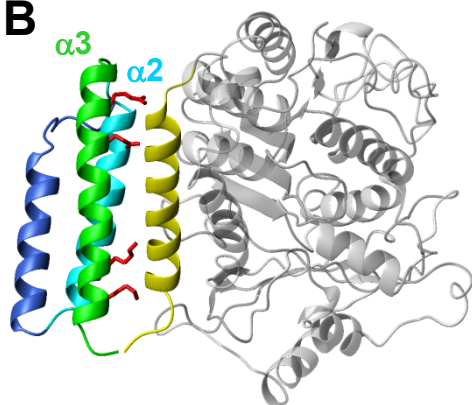

90°

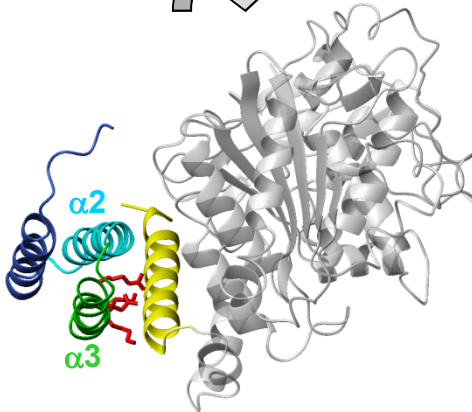**C**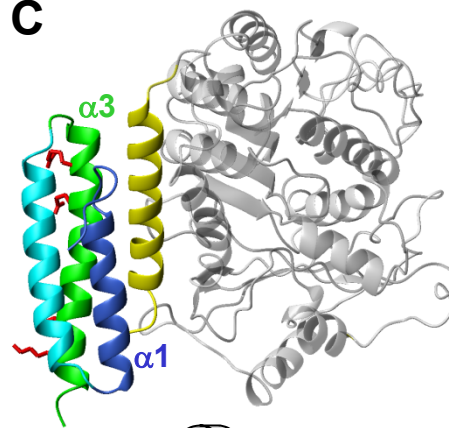

90°

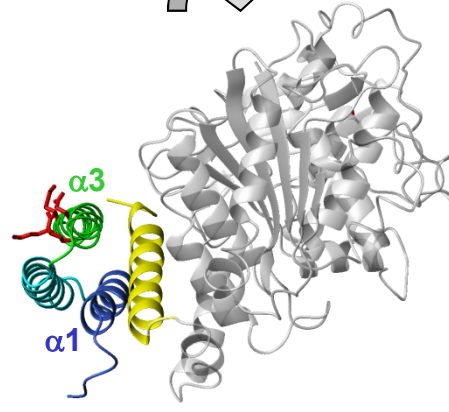**D**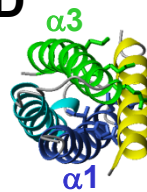

Supplementary Figure 7

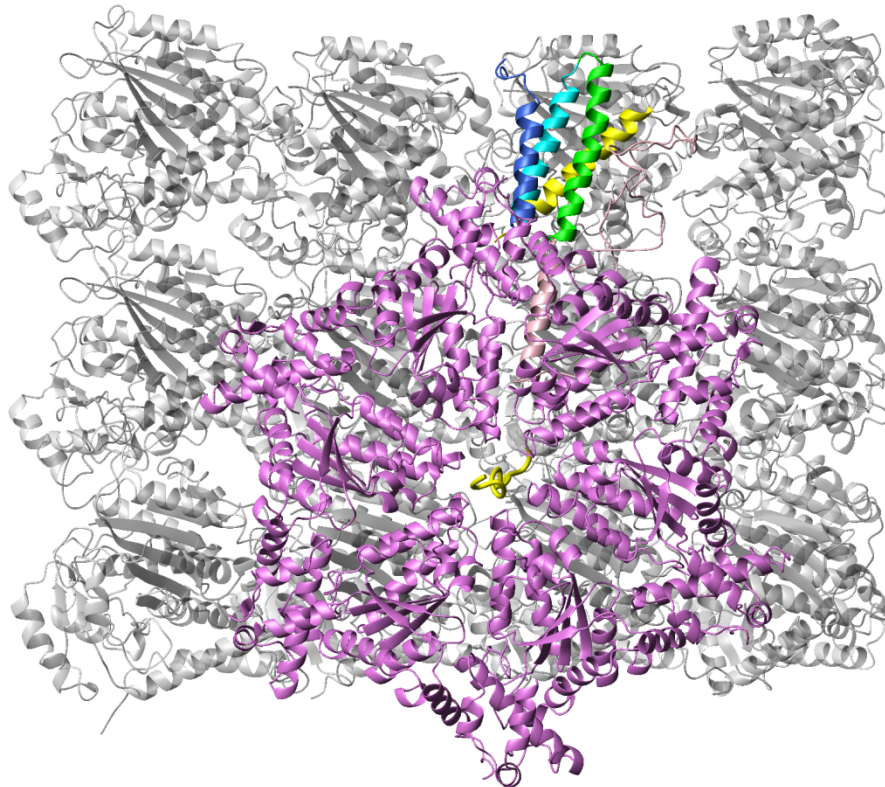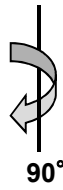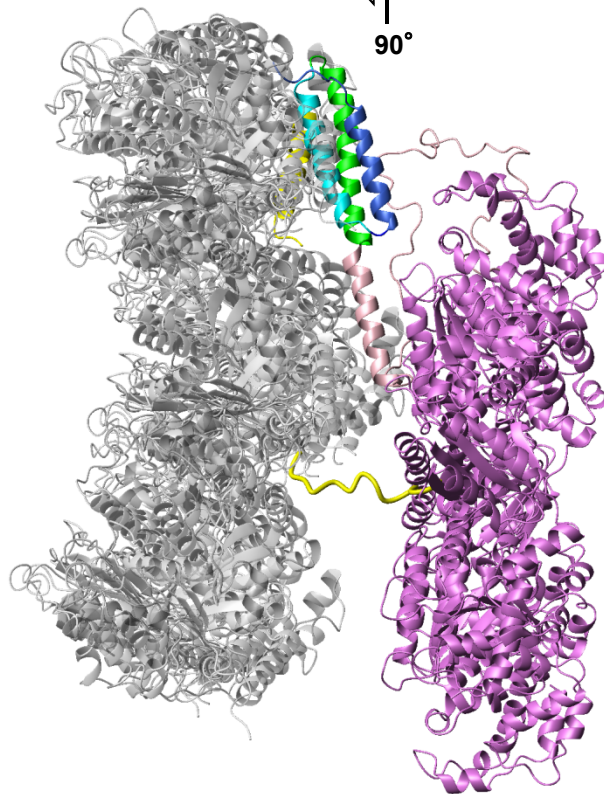

Supplementary Figure 8
